# Supplementary material for: Mixed-phase FeMoO 4 for synergistic photocatalytic peroxydisulfate activation toward efficient tetracycline degradation
Source: Royal Society of Chemistry journal article supplement (doi:10.1039/d5nj04620c), 2026-01-01
Supplement: d5nj04620c1.pdf [file d5nj04620c1.pdf]

## Supplementary Information

### Mixed-phase FeMoO<sub>4</sub> for synergistic photocatalytic peroxydisulfate activation toward efficient tetracycline degradation

Runyu Cai,<sup>†a</sup> Zhongliang Shi,<sup>†a</sup> Shifeng Li,<sup>a</sup> Shuhua Yao,<sup>a</sup> Dongjing Wang,<sup>a</sup> Man Xu<sup>\*ab</sup> and Xuan Cao<sup>\*c</sup>

<sup>a</sup>College of science, Shenyang University of Chemical Technology, Shenyang, Liaoning, 110142, China

<sup>b</sup>Instrumental Analysis Center, Shenyang University of Chemical Technology, Shenyang, Liaoning, 110142, China. E-mail: [xuman.jlu@vip.163.com](mailto:xuman.jlu@vip.163.com)

<sup>c</sup>Center for Interdisciplinary Research and Innovation, Muyuan Laboratory, Zhengzhou, Henan, 450016, China. E-mail: [cx.1988@aliyun.com](mailto:cx.1988@aliyun.com)

<sup>†</sup> These two authors contributed equally to this paper.

# CONTENT

1. **Text S1** Materials.
2. **Text S2** Characterization.
3. **Text S3** Photoelectrochemical measurements.
4. **Text S4** Liquid chromatography-mass spectrometry test.
5. **Fig. S1** SEM images of  $\text{FeMoO}_4$  (a). SEM-EDS mapping images of  $\text{FeMoO}_4$  (b-d).
6. **Fig. S2** Pseudo second-order kinetics models for different systems (a), solution pH (b), catalyst dosage (c), PDS dosage (d), TC concentration (e), Inorganic anions (f), scavengers (g), cycles (h). Reaction conditions: TC, 10 mg/L; pH, 3;  $\text{FeMoO}_4$ , 60 mg/L; PDS, 30 mg/L (a-c), 70 mg/L (d-h); anions, 10 mM (f).
7. **Fig. S3** LC-MS diagrams of TC degradation process.
8. **Fig. S4** Comparison of XRD patterns of  $\text{FeMoO}_4$  before and after the reaction.
9. **Table S1** Dynamic model fitting parameters of  $\text{FeMoO}_4$ ,  $\alpha\text{-FeMoO}_4$ , and  $\beta\text{-FeMoO}_4$ .
10. **Table S2** Dynamic model fitting parameters under different reaction conditions.
11. **Table S3** Dynamic model fitting parameters under different pH and catalyst dose.
12. **Table S4** Dynamic model fitting parameters under different PDS and TC concentration.
13. **Table S5** Dynamic model fitting parameters under different Inorganic anions.
14. **Table S6** Dynamic model fitting parameters under different scavengers.
15. **Table S7** Dynamic model fitting parameters under four cycles of  $\text{FeMoO}_4$ .
16. **Table S8** Specific surface area, pore volume and average pore size of  $\text{FeMoO}_4$ ,  $\alpha\text{-FeMoO}_4$ , and  $\beta\text{-FeMoO}_4$ .
17. **Table S9** Comparison of the TC degradation effects in different reaction systems.
18. **References**



## Text S1. Materials.

Methanol (MeOH, > 99.7%), ethanol (EtOH, > 99.7%) and sodium bicarbonate ( $\text{NaHCO}_3$ , > 99.5%) were obtained from Tianjin Yongda Chemical Reagent Co., Ltd. tert-Butanol (t-BuOH, > 99.5%), sodium chloride ( $\text{NaCl}$ , > 99.5%), sodium nitrate ( $\text{NaNO}_3$ , > 99%), disodium hydrogen phosphate dodecahydrate ( $\text{Na}_2\text{HPO}_4 \cdot 12\text{H}_2\text{O}$ , > 99%), sodium dihydrogen phosphate dodecahydrate ( $\text{NaH}_2\text{PO}_4 \cdot 12\text{H}_2\text{O}$ , > 99%), and sodium sulfate ( $\text{Na}_2\text{SO}_4$ , > 99%) were supplied by Tianjin Damao Chemical Reagent Co., Ltd. Sodium hydroxide ( $\text{NaOH}$ , > 96%) was provided by Tianjin Hengxing Chemical Reagent Manufacturing Co., Ltd. Ferrous sulfate heptahydrate ( $\text{FeSO}_4 \cdot 7\text{H}_2\text{O}$ , > 99%), sodium molybdate dihydrate ( $\text{Na}_2\text{MoO}_4 \cdot 2\text{H}_2\text{O}$ , > 99%), hydrochloric acid ( $\text{HCl}$ , 36–38%), TC hydrochloride ( $\text{C}_{22}\text{H}_{24}\text{N}_2\text{O}_8 \cdot \text{HCl}$ , > 98%), p-benzoquinone ( $\text{C}_6\text{H}_4\text{O}_2$ , > 98%), isopropanol (i-PrOH, > 99.7%), and sodium carbonate ( $\text{Na}_2\text{CO}_3$ , > 99.8%) were purchased from Sinopharm Chemical Reagent Co., Ltd. L-Histidine ( $\text{C}_6\text{H}_9\text{N}_3\text{O}_2$ , > 99%) was acquired from Macklin Biochemical Technology Co., Ltd., and sodium persulfate ( $\text{Na}_2\text{S}_2\text{O}_8$ , > 99%) was sourced from Shanghai Aladdin Biochemical Technology Co., Ltd.

## Text S2. Characterization.

The powder X-ray diffraction (XRD) measurements were performed using a D8 Advance Bruker X-ray diffractometer, utilizing Cu K $\alpha$  radiation ( $\lambda = 0.5418 \text{ nm}$ ) under conditions of 56 KV and 182 mA. To observe morphology and perform element mapping analysis, a scanning electron microscope (SEM-JSM-6360LV) equipped with energy dispersive X-ray spectroscopy (EDX-S-3400N) was utilized. The structural and morphological features of the nanoparticles were observed using a high-resolution transmission electron microscope (JEM-F200, Japan, TEM). The functional groups and chemical structure of the prepared catalyst samples were analyzed using the IRTracer-100 Fourier Transform Infrared Spectrometer (FT-IR) produced by Shimadzu Corporation of Japan. Specific surface areas were determined using a BELSORP-miniX analyzer through  $\text{N}_2$  adsorption-desorption, applying the Brunauer-Emmett-Teller (BET) and Barrett-Joyner-Halenda (BJH) methods. The chemical composition and valence states of the samples were analyzed using X-ray Photoelectron Spectroscopy (XPS-Thermo ESCALAB 250), with further investigation into

the charge transfer pathway. Additionally, the spectra were calibrated relative to the C 1s peak at 284.8 eV. The optical adsorption capacity of the catalysts was assessed using the Hitachi U4100 UV spectrometer, operating within the spectral range of 190-900 nm. Photoluminescence (PL) spectra were obtained using a HORIBA spectrometer, with a monochromator slit width of 5.0 nm. Bruker E500 Electron Paramagnetic Resonance (EPR) spectroscopy was employed to detect active species.

### **Text S3. Photoelectrochemical measurements.**

Electrochemical measurements were carried out on a CHI760E electrochemical workstation with a standard three-electrodes system. Among them, a Pt wire was used as the counter electrode, and the reference electrode was the saturated Ag/AgCl. The cleaned F-doped tin oxide (FTO) glass was used as the working electrode. 5 mg of corresponding photocatalyst and 20  $\mu$ L of Nafion (5%) were added into 980  $\mu$ L of ethanol to form a homogeneous slurry. The homogeneous slurry was ultrasonicated for 30 min and then coated on the FTO glass. The obtained system was dried at 150  $^{\circ}$ C for 60 min. The supporting electrolyte was Na<sub>2</sub>SO<sub>4</sub> solution (0.5 M) with the pH value of 6.8. The incident visible light source was Xe lamp (300 W). The photocurrent-time was investigated in the irradiation of Xe lamp at a bias potential of 0.5 V vs. Ag/AgCl. The electrochemical impedance spectroscopy (EIS) was detected by an AC voltage amplitude of 10 mV at -0.3 V versus Ag/AgCl over the frequency range from 10 kHz to 0.01 Hz. The Mott-Schottky was studied in the electrolyte of Na<sub>2</sub>SO<sub>4</sub> (0.5 M), and the frequency of the AC potential was set as 1000 Hz as well as the amplitude was 10 mV.

### **Text S4. Liquid chromatography-mass spectrometry test.**

The intermediates generated during the decomposition of HTC were identified using liquid chromatography-mass spectrometry (LC-MS). A C18 column (4.6 $\times$ 150 nm) was employed with an injection volume of 10  $\mu$ L, and eluent A consisted of 0.1% ammonium hydroxide (v/v), while acetonitrile served as eluent B. By combining 5% eluent A with 95% eluent B, effective separation could be achieved. Full-scan analysis in the range of 100 to 1500 m/z was conducted using electrospray ionization source in positive ionization mode (ESI(+)). The remaining operational parameters were set as follows: a capillary voltage of 4.5 kV, N<sub>2</sub> for desolvent gas, a gas temperature of 150  $^{\circ}$ C, and a gas flow rate of 15 L/min.

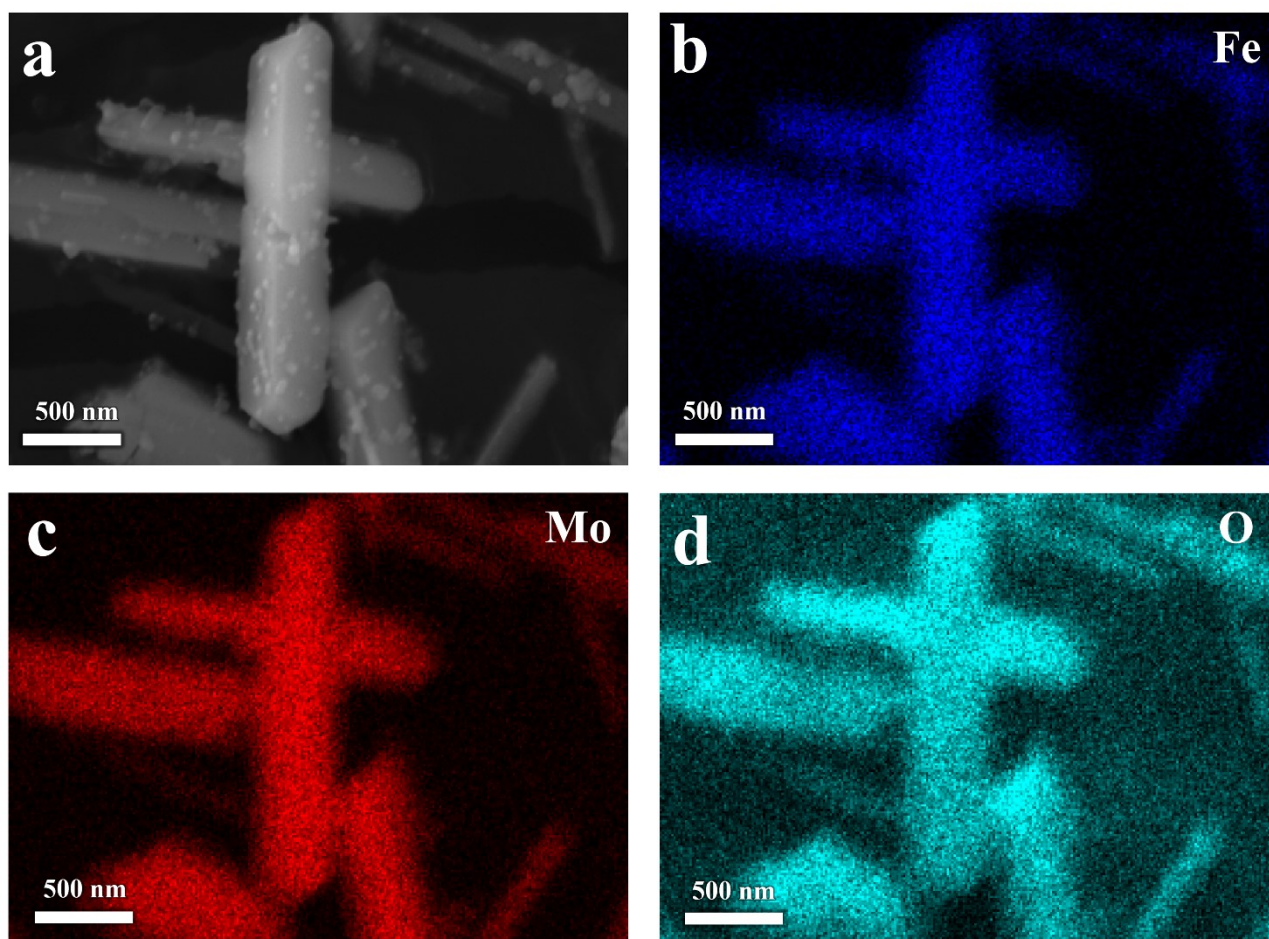

**Fig. S1** SEM images of FeMoO<sub>4</sub> (a). SEM-EDS mapping images of FeMoO<sub>4</sub> (b-d).

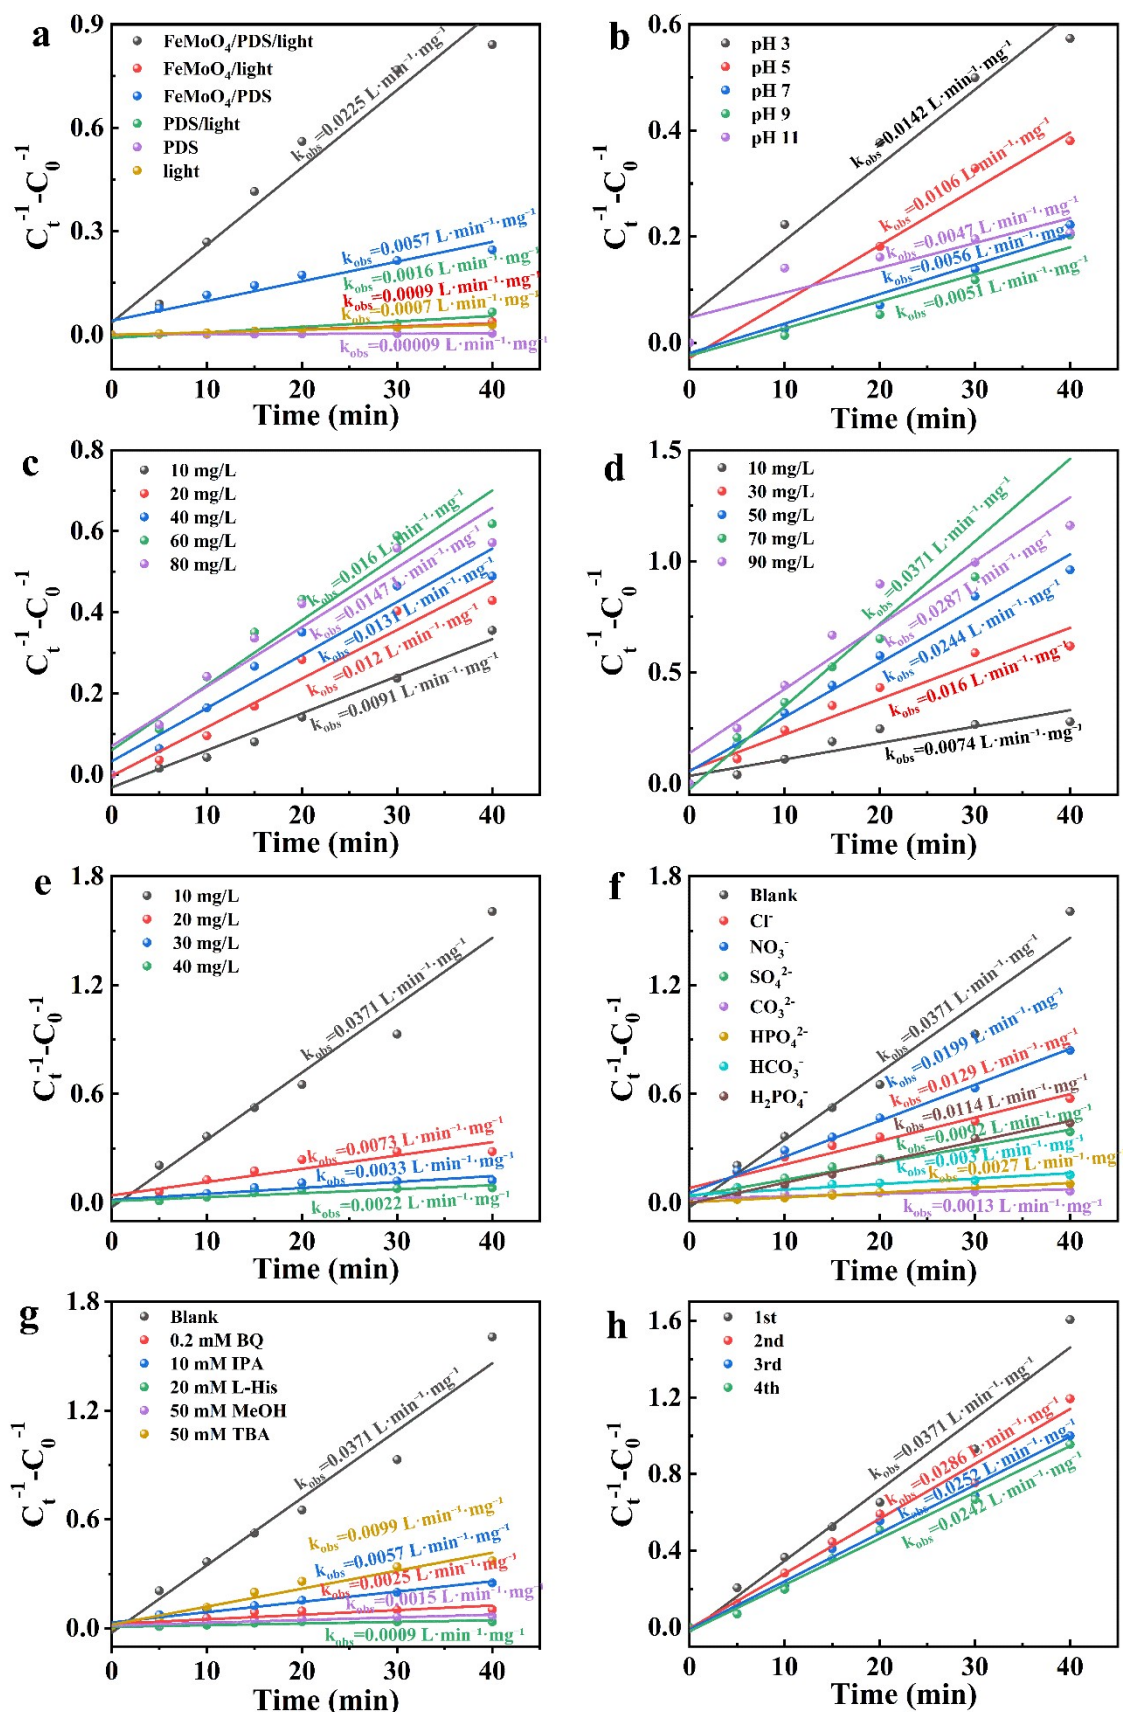

**Fig. S2** Pseudo second-order kinetics models for different systems (a), solution pH (b), catalyst dosage (c), PDS dosage (d), TC concentration (e), Inorganic anions (f), scavengers (g), cycles (h). Reaction conditions: TC, 10 mg/L; pH, 3; FeMoO<sub>4</sub>, 60 mg/L; PDS, 30 mg/L (a-c), 70 mg/L (d-h); anions, 10 mM (f).



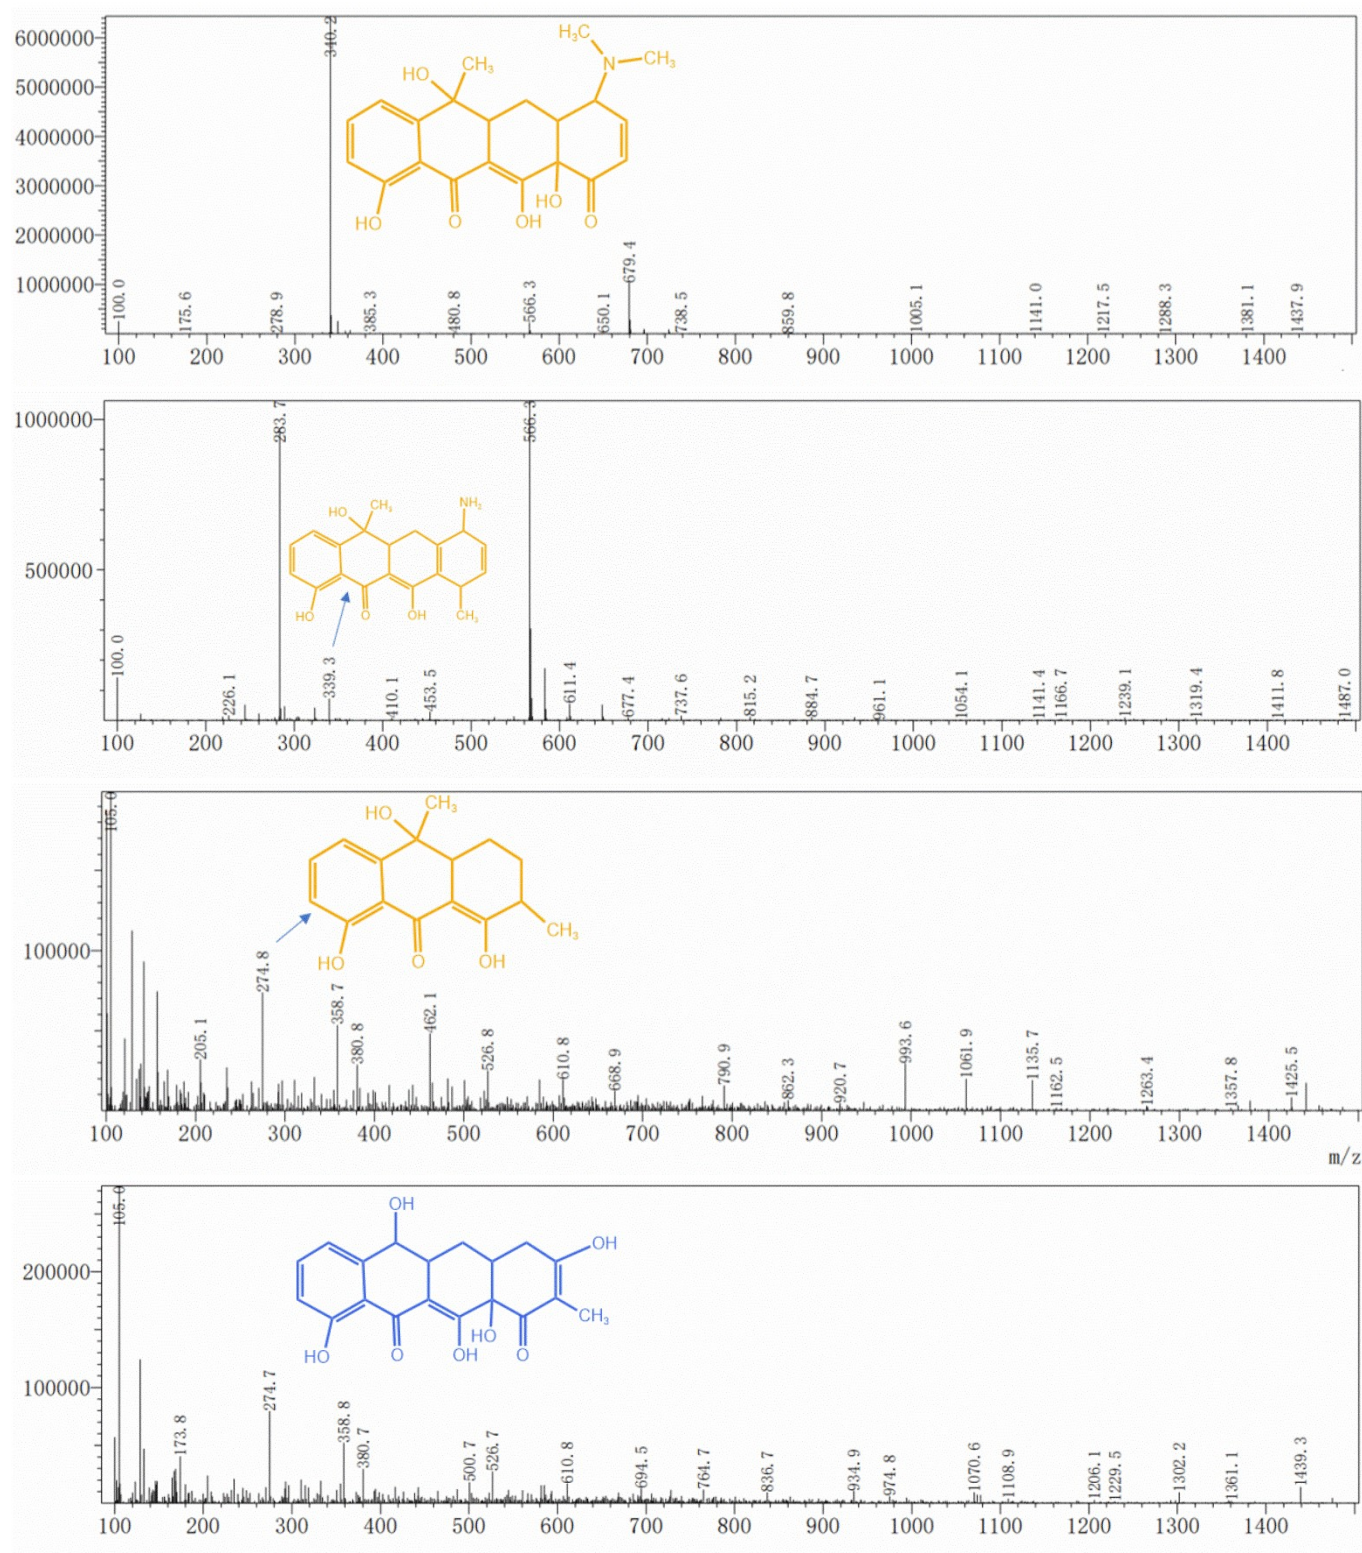



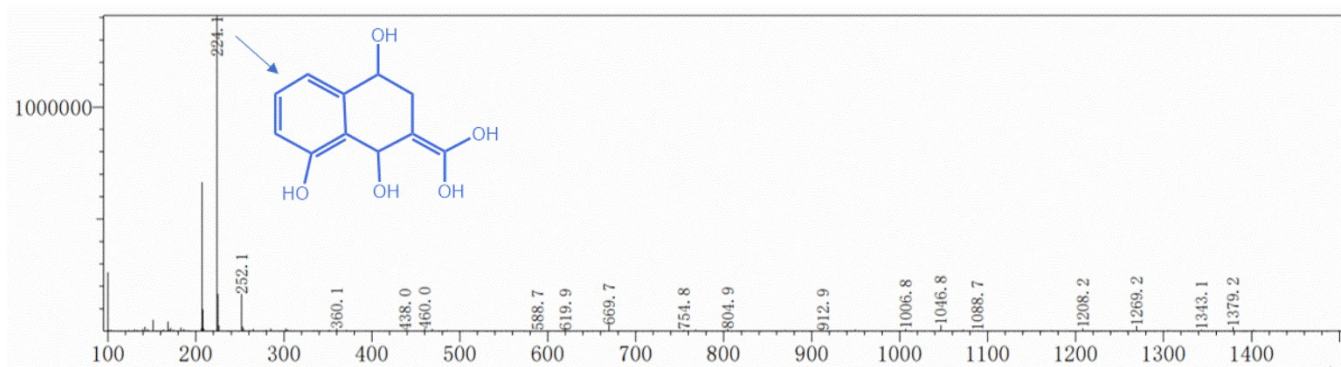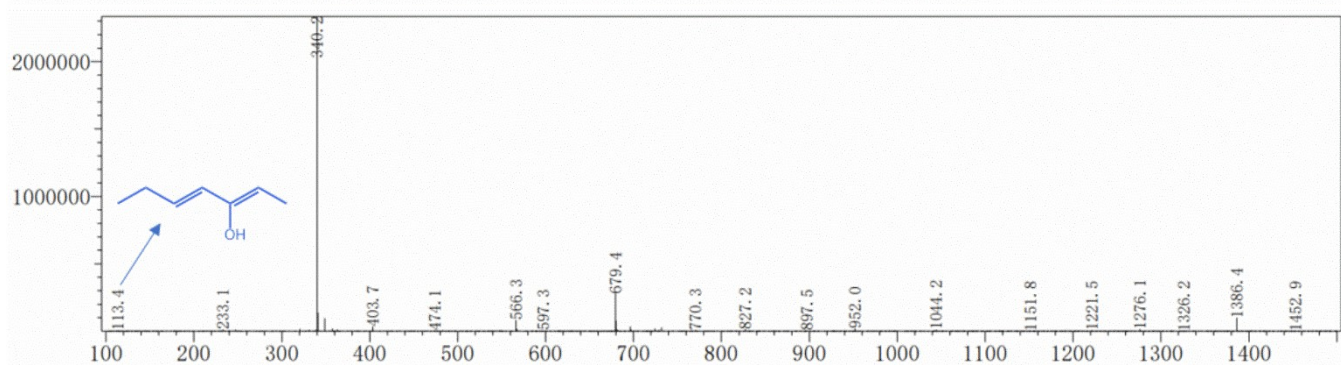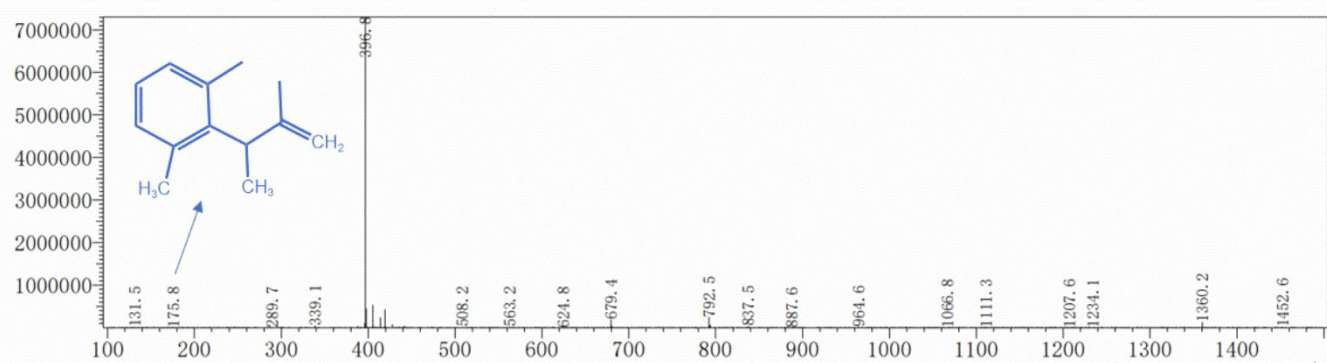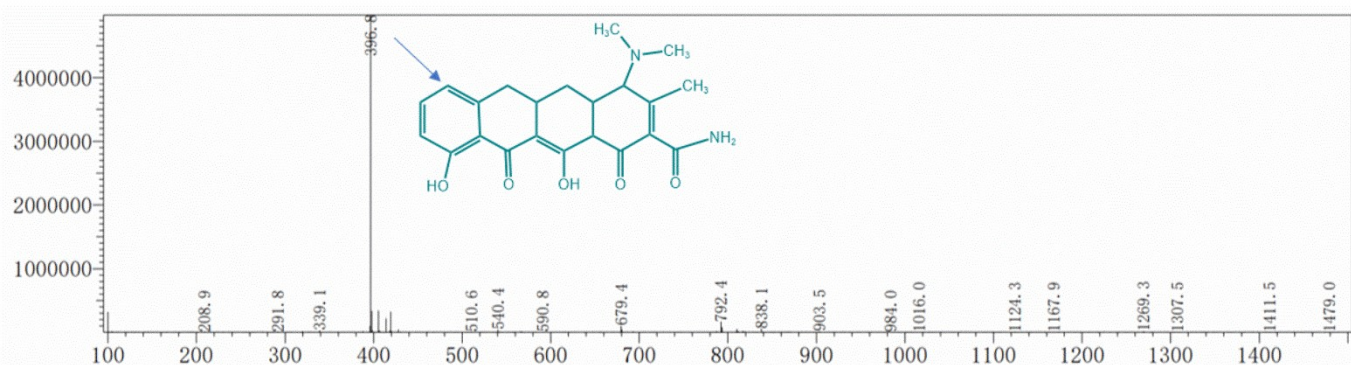

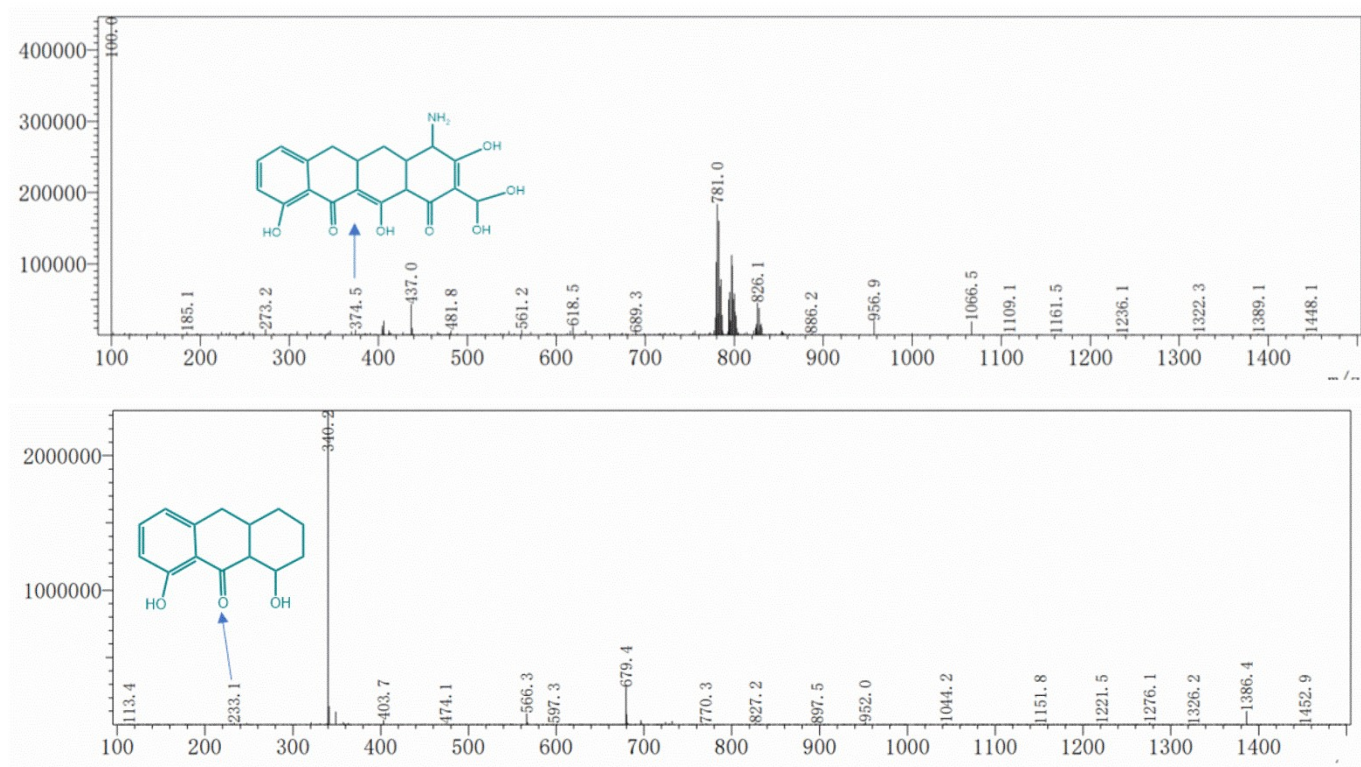

**Fig. S3** LC-MS diagrams of TC degradation process.

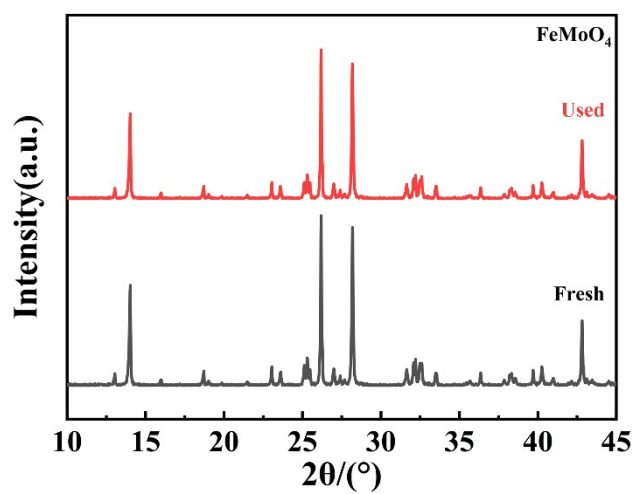

**Fig. S4** Comparison of XRD patterns of  $\text{FeMoO}_4$  before and after the reaction.

**Table S1 Dynamic model fitting parameters of FeMoO<sub>4</sub>, α-FeMoO<sub>4</sub>, and β-FeMoO<sub>4</sub>.**

| Sample               | [PDS]<br>(mg/L) | pH | [Cat]<br>(mg/L) | [Pollution]<br>(mg/L) | Pseudo first-order reaction   |                | Pseudo second-order reaction                       |                |
|----------------------|-----------------|----|-----------------|-----------------------|-------------------------------|----------------|----------------------------------------------------|----------------|
|                      |                 |    |                 |                       | $k_1$<br>(min <sup>-1</sup> ) | R <sup>2</sup> | $k_2$ (L·<br>min <sup>-1</sup> ·mg <sup>-1</sup> ) | R <sup>2</sup> |
| α-FeMoO <sub>4</sub> | 30              | 3  | 60              | 10                    | 0.0328                        | 0.798          | 0.009                                              | 0.881          |
| β-FeMoO <sub>4</sub> | 30              | 3  | 60              | 10                    | 0.0306                        | 0.814          | 0.0078                                             | 0.922          |
| FeMoO <sub>4</sub>   | 30              | 3  | 60              | 10                    | 0.0428                        | 0.804          | 0.016                                              | 0.941          |

**Table S2 Dynamic model fitting parameters under different reaction conditions.**

| Visible light | [PDS]<br>(mg/L) | pH | [Cat]<br>(mg/L) | [Pollution]<br>(mg/L) | Pseudo first-order reaction |                | Pseudo second-order reaction                       |                |
|---------------|-----------------|----|-----------------|-----------------------|-----------------------------|----------------|----------------------------------------------------|----------------|
|               |                 |    |                 |                       | $k_1$ (min <sup>-1</sup> )  | R <sup>2</sup> | $k_2$ (L·<br>min <sup>-1</sup> ·mg <sup>-1</sup> ) | R <sup>2</sup> |
| Yes           | 30              | 3  | 60              | 10                    | 0.0513                      | 0.835          | 0.0225                                             | 0.961          |
| Yes           | 0               | 3  | 60              | 10                    | 0.0069                      | 0.966          | 0.0009                                             | 0.949          |
| No            | 30              | 3  | 60              | 10                    | 0.0246                      | 0.809          | 0.0057                                             | 0.926          |
| Yes           | 30              | 3  | 0               | 10                    | 0.0118                      | 0.914          | 0.0016                                             | 0.88           |
| No            | 30              | 3  | 0               | 10                    | 0.0008                      | 0.988          | 8.6 <sup>-5</sup>                                  | 0.989          |
| Yes           | 0               | 3  | 0               | 10                    | 0.0065                      | 0.989          | 0.0007                                             | 0.991          |

**Table S3 Dynamic model fitting parameters under different pH and catalyst dose.**

| [PDS]<br>(mg/L) | pH | [Cat]<br>(mg/L) | [Pollution]<br>(mg/L) | Pseudo first-order reaction |                | Pseudo second-order reaction                       |                |
|-----------------|----|-----------------|-----------------------|-----------------------------|----------------|----------------------------------------------------|----------------|
|                 |    |                 |                       | $k_1$ (min <sup>-1</sup> )  | R <sup>2</sup> | $k_2$ (L·<br>min <sup>-1</sup> ·mg <sup>-1</sup> ) | R <sup>2</sup> |
| 30              | 3  | 60              | 10                    | 0.0419                      | 0.833          | 0.0142                                             | 0.963          |
| 30              | 5  | 60              | 10                    | 0.0401                      | 0.944          | 0.0106                                             | 0.957          |
| 30              | 7  | 60              | 10                    | 0.0272                      | 0.995          | 0.0056                                             | 0.958          |
| 30              | 9  | 60              | 10                    | 0.0267                      | 0.975          | 0.0051                                             | 0.928          |
| 30              | 11 | 60              | 10                    | 0.0227                      | 0.709          | 0.0047                                             | 0.798          |
| 30              | 3  | 10              | 10                    | 0.0381                      | 0.991          | 0.0091                                             | 0.976          |
| 30              | 3  | 20              | 10                    | 0.042                       | 0.91           | 0.012                                              | 0.958          |
| 30              | 3  | 40              | 10                    | 0.0414                      | 0.84           | 0.0131                                             | 0.941          |
| 30              | 3  | 60              | 10                    | 0.0428                      | 0.804          | 0.016                                              | 0.941          |
| 30              | 3  | 80              | 10                    | 0.0402                      | 0.785          | 0.0147                                             | 0.925          |

**Table S4 Dynamic model fitting parameters under different PDS and TC concentration.**

| [PDS]<br>(mg/L) | pH | [Cat]<br>(mg/L) | [Pollution]<br>(mg/L) | Pseudo first-order<br>reaction |                | Pseudo second-order<br>reaction                    |                |
|-----------------|----|-----------------|-----------------------|--------------------------------|----------------|----------------------------------------------------|----------------|
|                 |    |                 |                       | $k_1$ (min <sup>-1</sup> )     | R <sup>2</sup> | $k_2$ (L·<br>min <sup>-1</sup> ·mg <sup>-1</sup> ) | R <sup>2</sup> |
| 10              | 3  | 60              | 10                    | 0.0308                         | 0.788          | 0.0074                                             | 0.856          |
| 30              | 3  | 60              | 10                    | 0.0428                         | 0.804          | 0.016                                              | 0.941          |
| 50              | 3  | 60              | 10                    | 0.0501                         | 0.823          | 0.0244                                             | 0.982          |
| 70              | 3  | 60              | 10                    | 0.0585                         | 0.872          | 0.0371                                             | 0.968          |
| 90              | 3  | 60              | 10                    | 0.0514                         | 0.729          | 0.0287                                             | 0.924          |
| 70              | 3  | 60              | 10                    | 0.0585                         | 0.872          | 0.0371                                             | 0.968          |
| 70              | 3  | 60              | 20                    | 0.0413                         | 0.75           | 0.0073                                             | 0.884          |
| 70              | 3  | 60              | 30                    | 0.0362                         | 0.767          | 0.0033                                             | 0.853          |
| 70              | 3  | 60              | 40                    | 0.0341                         | 0.795          | 0.0022                                             | 0.872          |

**Table S5 Dynamic model fitting parameters under different Inorganic anions.**

| anions                                      | [anions]<br>(mM) | Pseudo first-order<br>reaction |                | Pseudo second-order reaction                       |                |
|---------------------------------------------|------------------|--------------------------------|----------------|----------------------------------------------------|----------------|
|                                             |                  | $k_1$ (min <sup>-1</sup> )     | R <sup>2</sup> | $k_2$ (L·<br>min <sup>-1</sup> ·mg <sup>-1</sup> ) | R <sup>2</sup> |
| Blank                                       | 0                | 0.0585                         | 0.872          | 0.0371                                             | 0.968          |
| Cl <sup>-</sup>                             | 10               | 0.0366                         | 0.753          | 0.0129                                             | 0.943          |
| NO <sub>3</sub> <sup>-</sup>                | 10               | 0.0451                         | 0.824          | 0.0199                                             | 0.988          |
| SO <sub>4</sub> <sup>2-</sup>               | 10               | 0.0327                         | 0.858          | 0.0092                                             | 0.972          |
| CO <sub>3</sub> <sup>2-</sup>               | 10               | 0.0085                         | 0.606          | 0.0013                                             | 0.655          |
| HPO <sub>4</sub> <sup>2-</sup>              | 10               | 0.016                          | 0.976          | 0.0027                                             | 0.993          |
| HCO <sub>3</sub> <sup>-</sup>               | 10               | 0.0155                         | 0.672          | 0.003                                              | 0.782          |
| H <sub>2</sub> PO <sub>4</sub> <sup>-</sup> | 10               | 0.0387                         | 0.947          | 0.0114                                             | 0.995          |

**Table S6 Dynamic model fitting parameters under different scavengers.**

| scavenger | [scavenger]<br>(mM) | Pseudo first-order<br>reaction |                | Pseudo second-order<br>reaction                    |                |
|-----------|---------------------|--------------------------------|----------------|----------------------------------------------------|----------------|
|           |                     | $k_1$ (min <sup>-1</sup> )     | R <sup>2</sup> | $k_2$ (L·<br>min <sup>-1</sup> ·mg <sup>-1</sup> ) | R <sup>2</sup> |
| Blank     | 0                   | 0.0585                         | 0.872          | 0.0371                                             | 0.968          |
| BQ        | 0.2                 | 0.0153                         | 0.721          | 0.0025                                             | 0.76           |
| IPA       | 10                  | 0.025                          | 0.849          | 0.0057                                             | 0.958          |
| L-His     | 20                  | 0.0067                         | 0.766          | 0.0009                                             | 0.778          |
| MeOH      | 50                  | 0.01                           | 0.805          | 0.0015                                             | 0.853          |
| TBA       | 50                  | 0.0354                         | 0.871          | 0.0099                                             | 0.951          |

**Table S7 Dynamic model fitting parameters under four cycles of FeMoO<sub>4</sub>.**

| Number of cycles | Pseudo first-order reaction |                | Pseudo second-order reaction                   |                |
|------------------|-----------------------------|----------------|------------------------------------------------|----------------|
|                  | $k_1$ (min <sup>-1</sup> )  | R <sup>2</sup> | $k_2$ (L·min <sup>-1</sup> ·mg <sup>-1</sup> ) | R <sup>2</sup> |
| 1                | 0.0585                      | 0.872          | 0.0371                                         | 0.968          |
| 2                | 0.0555                      | 0.88           | 0.0286                                         | 0.986          |
| 3                | 0.0554                      | 0.883          | 0.0252                                         | 0.985          |
| 4                | 0.0552                      | 0.9            | 0.0242                                         | 0.992          |

**Table S8 Specific surface area, pore volume and average pore size of FeMoO<sub>4</sub>, α-FeMoO<sub>4</sub>, and β-FeMoO<sub>4</sub>.**

| Sample               | Surface area (m <sup>2</sup> /g) | Pore volume (cm <sup>3</sup> /g) | Pore size (nm) |
|----------------------|----------------------------------|----------------------------------|----------------|
| FeMoO <sub>4</sub>   | 18.82                            | 0.147                            | 31.21          |
| α-FeMoO <sub>4</sub> | 8.16                             | 0.044                            | 21.65          |
| β-FeMoO <sub>4</sub> | 3.31                             | 0.026                            | 30.95          |

**Table S9 Comparison of the TC degradation effects in different reaction systems.**

| Catalyst                                                                            | M (g/L) | C (mg/L) | T (min) | R (%) | I mg/(g·min) | System                                                                                         |            |
|-------------------------------------------------------------------------------------|---------|----------|---------|-------|--------------|------------------------------------------------------------------------------------------------|------------|
| g-C <sub>3</sub> N <sub>4</sub> /BC/Fe <sub>2</sub> O <sub>3</sub>                  | 0.1     | 5        | 60      | 94.9  | 0.791        | g-C <sub>3</sub> N <sub>4</sub> /BC/Fe <sub>2</sub> O <sub>3</sub> /PDS/light                  | 1          |
| Bi <sub>2</sub> WO <sub>6</sub> /Fe <sub>2</sub> O <sub>3</sub>                     | 0.33    | 30       | 30      | 84.8  | 2.57         | Bi <sub>2</sub> WO <sub>6</sub> /Fe <sub>2</sub> O <sub>3</sub> /PDS/light                     | 2          |
| La/TiO <sub>2</sub> @g-C <sub>3</sub> N <sub>4</sub>                                | 0.5     | 30       | 60      | 95.52 | 0.955        | La/TiO <sub>2</sub> @g-C <sub>3</sub> N <sub>4</sub> /PDS/light                                | 3          |
| Mn-FeOOH/CNNS                                                                       | 0.3     | 20       | 50      | 99.7  | 1.329        | Mn-FeOOH/CNNS/PDS/light                                                                        | 4          |
| MnFe <sub>2</sub> O <sub>4</sub> /BC/P-CN                                           | 1       | 50       | 70      | 99.7  | 0.712        | MnFe <sub>2</sub> O <sub>4</sub> /BC/P-CN/PDS/light                                            | 5          |
| FeOOH/g-C <sub>3</sub> N <sub>4</sub>                                               | 0.3     | 20       | 80      | 98.8  | 0.823        | FeOOH/g-C <sub>3</sub> N <sub>4</sub> /PDS/light                                               | 6          |
| BiOBr                                                                               | 1       | 20       | 90      | 80.3  | 0.178        | BiOBr/PDS/light                                                                                | 7          |
| Nb <sub>2</sub> O <sub>5</sub> /C <sub>3</sub> N <sub>5</sub>                       | 0.1     | 10       | 160     | 95    | 0.594        | Nb <sub>2</sub> O <sub>5</sub> /C <sub>3</sub> N <sub>5</sub> /PDS/light                       | 8          |
| g-C <sub>3</sub> N <sub>5</sub> /BiOCl                                              | 0.3     | 5        | 90      | 93.7  | 0.174        | g-C <sub>3</sub> N <sub>5</sub> /BiOCl/PDS/light                                               | 9          |
| Bi <sub>2</sub> Fe <sub>4</sub> O <sub>9</sub> /rGO/g-C <sub>3</sub> N <sub>4</sub> | 0.2     | 10       | 40      | 93.8  | 1.173        | Bi <sub>2</sub> Fe <sub>4</sub> O <sub>9</sub> /rGO/g-C <sub>3</sub> N <sub>4</sub> /PDS/light | 10         |
| ZnFe <sub>2</sub> O <sub>4</sub> /Ag                                                | 0.3     | 20       | 80      | 90.06 | 0.751        | ZnFe <sub>2</sub> O <sub>4</sub> /Ag/PDS/light                                                 | 11         |
| FeMoO <sub>4</sub>                                                                  | 0.06    | 10       | 40      | 94.18 | 3.924        | FeMoO <sub>4</sub> /PDS/light                                                                  | This paper |

The variables C, R, M, and T represent the pollutant concentration (mg/L), target pollutant removal efficiency (%), catalyst dosage (g/L), and treatment time (min), respectively.



## References

- 1 H. Yu, J. Zhang, R. Zhai, C. Gao, Y. Zhang, C. Tian and Q. Ma, Carbon, 2024, **230**, 119681.
- 2 W. Wang, G. Wei, Z. Fan, L. Zhang, J. Gu and F. Gao, Journal of Environmental Chemical Engineering, 2025, **13**, 116192.
- 3 Y. Wang, J. Xiu, T. Gan, H. Zou and F. Li, RSC Advances, 2023, **13**, 8383-8393.
- 4 Y. Li, C. Qu, Q. Ye, F. Meng, D. Yang and L. Wang, Environmental Research, 2024, **257**, 119293.
- 5 X. Liu, W. Liu, H. Zhan, X. Chen and H. Li, Solid State Sciences, 2025, **168**, 108016.
- 6 Y. Li, C. Qu, Q. Ye, F. Meng, D. Yang and L. Wang, Journal of Environmental Chemical Engineering, 2024, **12**, 113791.
- 7 Q. He, M. Ge and Q. Yu, Journal of Chemical Sciences, 2021, **133**, 98.
- 8 W. Liao, Z. Yang, Y. Wang, S. Li, C. Wang and Z. Zhou, Chemical Engineering Journal, 2023, **478**, 147346.
- 9 Y. Liu, P. Wang, C. Yin, C. Xu, X. Kang, Z. Jing, L. Chen and Z. Wang, Journal of Environmental Chemical Engineering, 2025, **13**, 115565.
- 10 Z. Wu, J. Shi and H. Deng, Separation and Purification Technology, 2024, **349**, 127779.
- 11 T. Song, X. Meng, H. Wang, C. Zhang and M. Ge, Separation and Purification Technology, 2022, **297**, 121474.
